# Supplementary material
Source: HighWire-hosted journal article supplement (https://www.life-science-alliance.org/content/4/2/e202000805/F13)

Supplementary Figure 9A.

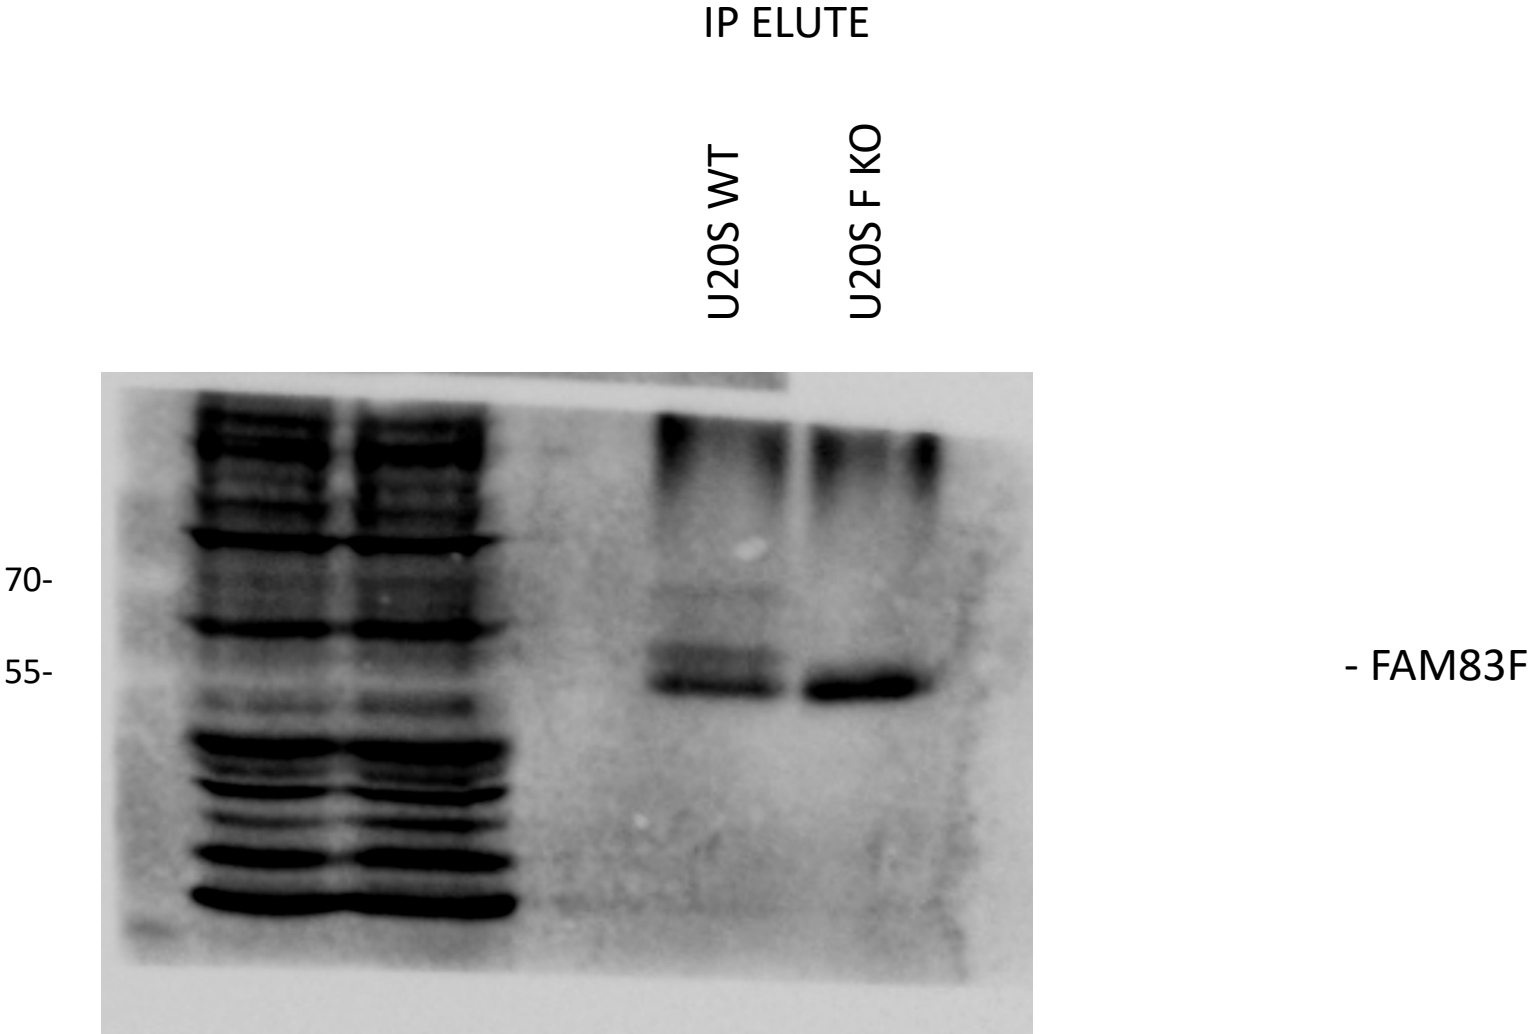

Supplement: inline-supplementary-material-9 [file inline-supplementary-material-9.pdf]
